# Supplementary material for: (S)-2-Heptanol, the alarm pheromone of the stingless bee Melipona solani (Hymenoptera, Meliponini)
Source: Springer Nature journal article supplement (doi:10.1007/s13592-019-00639-2), 2019-05-15

**Online resource 3.** Behavioural responses of *Melipona solani* workers to two different concentrations of mandibular extract and synthetic 2-heptanol in feeding sites at 300 m of the colony. **A) Mandibular gland (M):** 0.1 EQ (*Kruskal-Wallis*  $H = 14.44$ ,  $df = 1$ ,  $P < 0.001$ ), 1 EQ (*Kruskal-Wallis*  $H = 14.34$ ,  $df = 1$ ,  $P < 0.001$ ). **B) (R + S)-2-heptanol (R + S):** 0.1 EQ (*Kruskal-Wallis*  $H = 5.34$ ,  $df = 1$ ,  $P < 0.05$ ), 1 EQ (*Kruskal-Wallis*  $H = 9.42$ ,  $df = 1$ ,  $P < 0.01$ ). **C) (R)-2-heptanol (R):** 0.1 EQ (*Kruskal-Wallis*  $H = 2.91$ ,  $df = 1$ ,  $P = 0.08$ ), 1 EQ (*Kruskal-Wallis*  $H = 3.89$ ,  $df = 1$ ,  $P < 0.05$ ). **D) (S)-2-heptanol (S):** 0.1 EQ (*Kruskal-Wallis*  $H = 13.20$ ,  $df = 1$ ,  $P < 0.001$ ), 1 EQ (*Kruskal-Wallis*  $H = 14.35$ ,  $df = 1$ ,  $P < 0.001$ ).  $N=10$  replicates per concentration. (\*\* $P < 0.001$ , \* $P < 0.01$ . \* $P < 0.05$ , NS Non-significant).

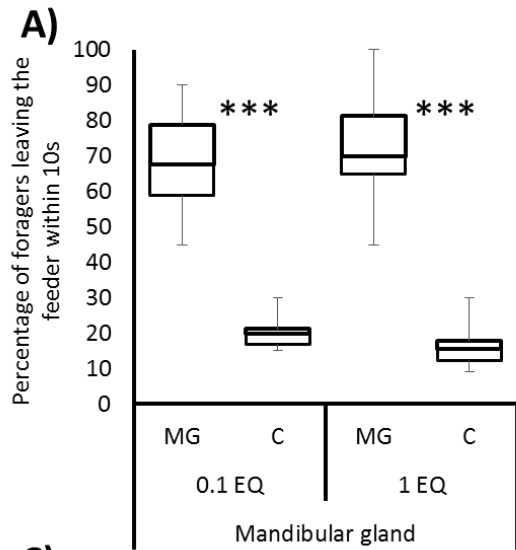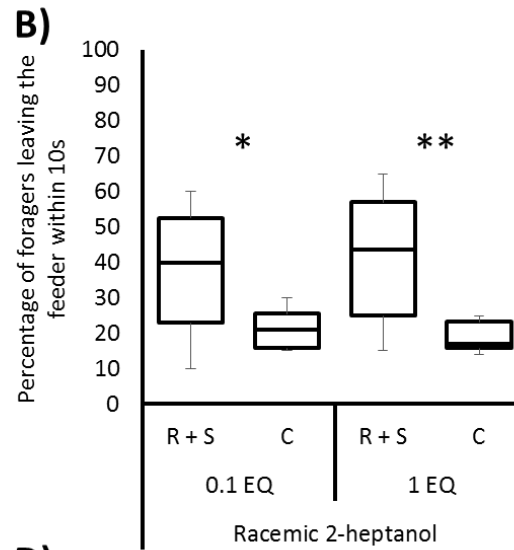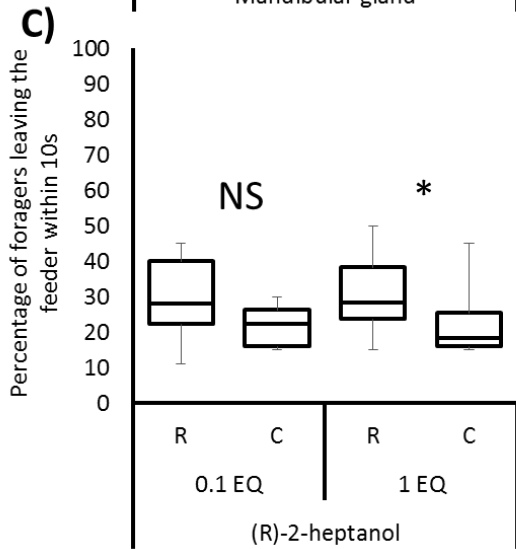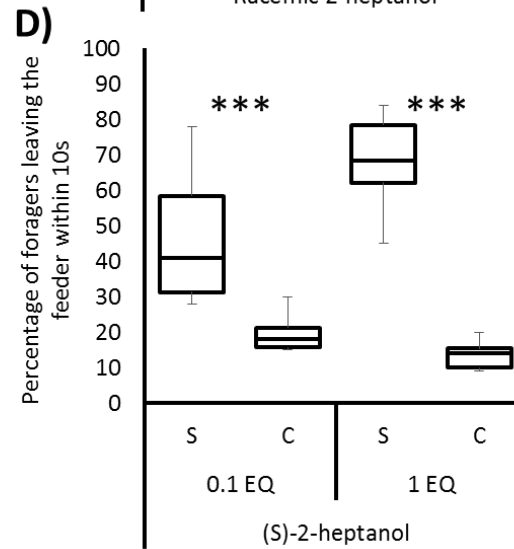

Supplement: MOESM3 [file 13592_2019_639_MOESM3_ESM.pdf]
